# Supplementary material for: Joint Selenium–Iodine Supply and Arbuscular Mycorrhizal Fungi Inoculation Affect Yield and Quality of Chickpea Seeds and Residual Biomass
Source: MDPI journal article supplement (doi:10.3390/plants9070804), 2020-06-27
Supplement: s1 [file s1]

## Supplemental Figures

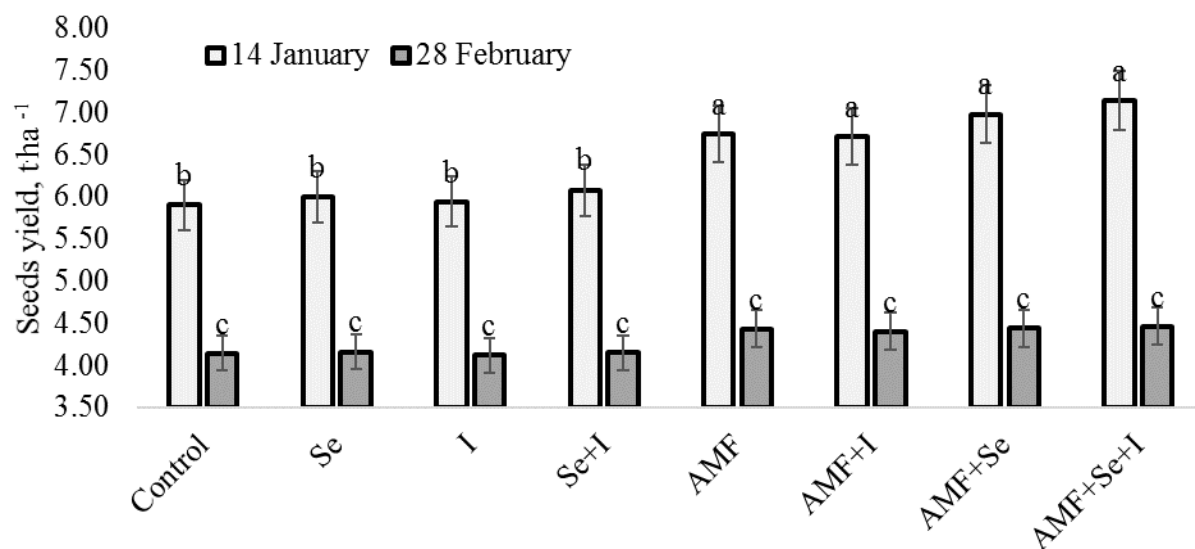

**Figure S1.** Interaction between planting time and AMF biofortification on the seed yield. Values followed by different letters are significantly different according to Duncan's test at  $p \leq 0.05$ .

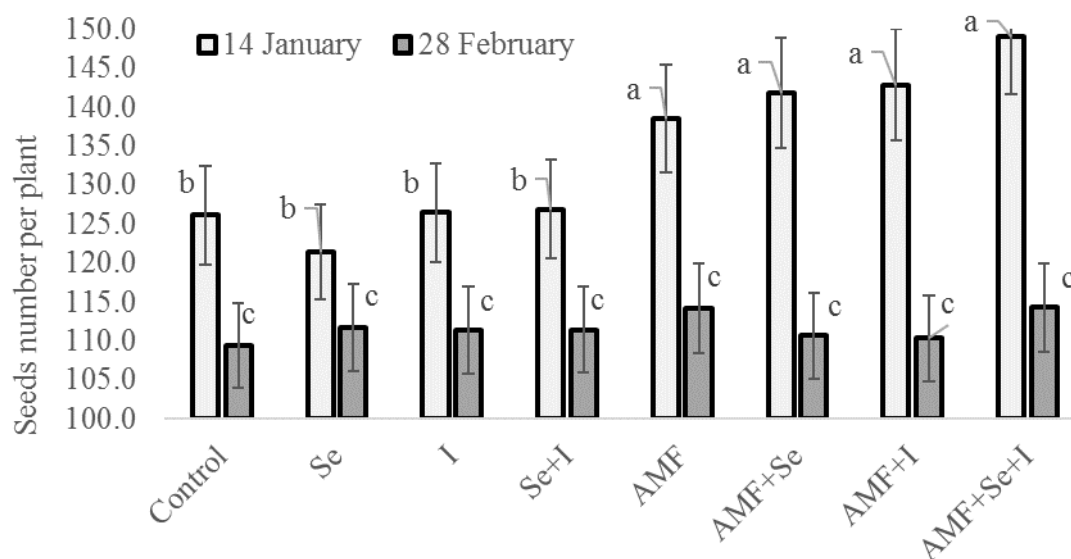

**Figure S2.** Interaction between planting time and AMF biofortification on the seed number per plant. Values followed by different letters are significantly different according to Duncan's test at  $p \leq 0.05$ .

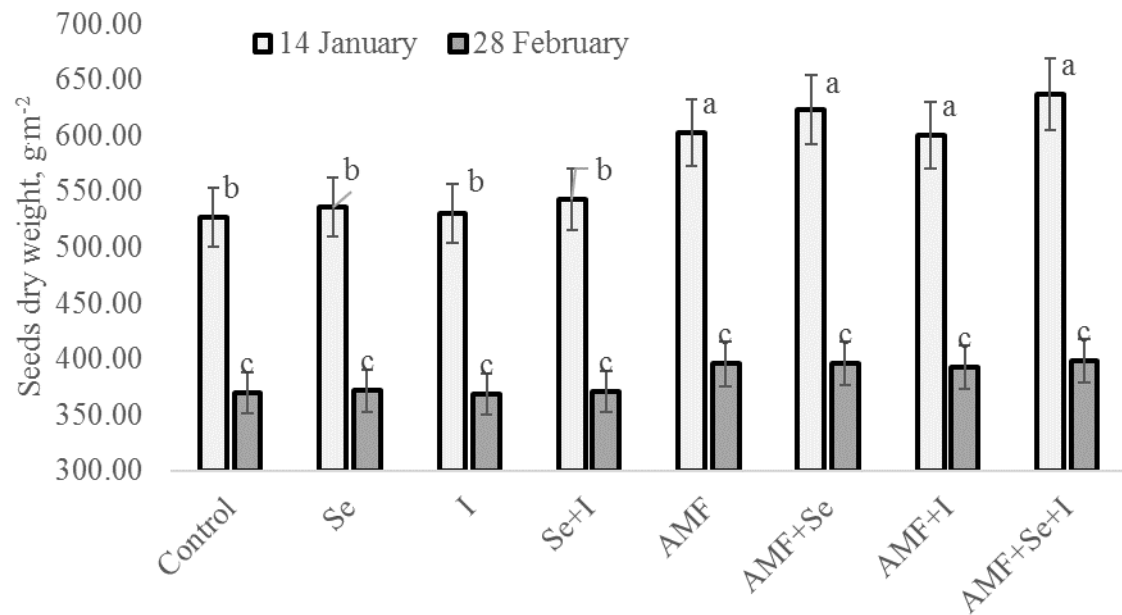

**Figure S3.** Interaction between planting time and AMF biofortification on seed dry weight. Values followed by different letters are significantly different according to Duncan's test at  $p \leq 0.05$ .

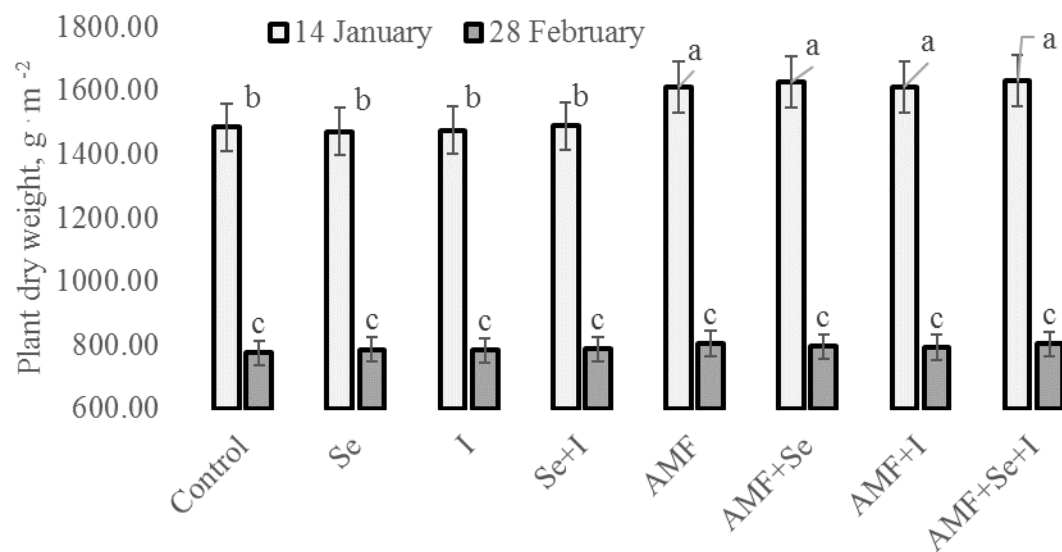

**Figure S4.** Interaction between planting time and AMF biofortification on plant dry weight. Values followed by different letters are significantly different according to Duncan's test at  $p \leq 0.05$ .
